# Supplementary material for: Bioinspired MXene-Based User-Interactive Electronic Skin for Digital and Visual Dual-Channel Sensing
Source: PubMed Central journal article supplement (PMC9065218; doi:10.1007/s40820-022-00838-0), 2022-05-03
Supplement: 40820_2022_838_MOESM1_ESM.pdf [file 40820_2022_838_MOESM1_ESM.pdf]

Supporting Information for

## Bioinspired MXene-Based User-Interactive Electronic Skin for Digital and Visual Dual-Channel Sensing

Wentao Cao<sup>1,2</sup>, Zheng Wang<sup>1</sup>, Xiaohao Liu<sup>1</sup>, Zhi Zhou<sup>1</sup>, Yue Zhang<sup>1</sup>, Shisheng He<sup>1,\*</sup>, Daxiang Cui<sup>1,2,3,\*</sup>, Feng Chen<sup>1,\*</sup>

<sup>1</sup>Department of Orthopedic, Spinal Pain Research Institute, Shanghai Tenth People's Hospital, School of Medicine, Tongji University, Shanghai 200072, P. R. China

<sup>2</sup>National Engineering Research Center for Nanotechnology, Shanghai 200241, P. R. China

<sup>3</sup>Institute of Micro-Nano Science and Technology, School of Electronic Information and Electrical Engineering, Shanghai Jiao Tong University, Shanghai 200240, P. R. China

\*Corresponding authors. E-mail: [fchen@tongji.edu.cn](mailto:fchen@tongji.edu.cn) (Feng Chen); [tjhs7418@tongji.edu.cn](mailto:tjhs7418@tongji.edu.cn) (Shisheng He); [dx cui@sjtu.edu.cn](mailto:dx cui@sjtu.edu.cn) (Daxiang Cui)

### Supplementary Figures

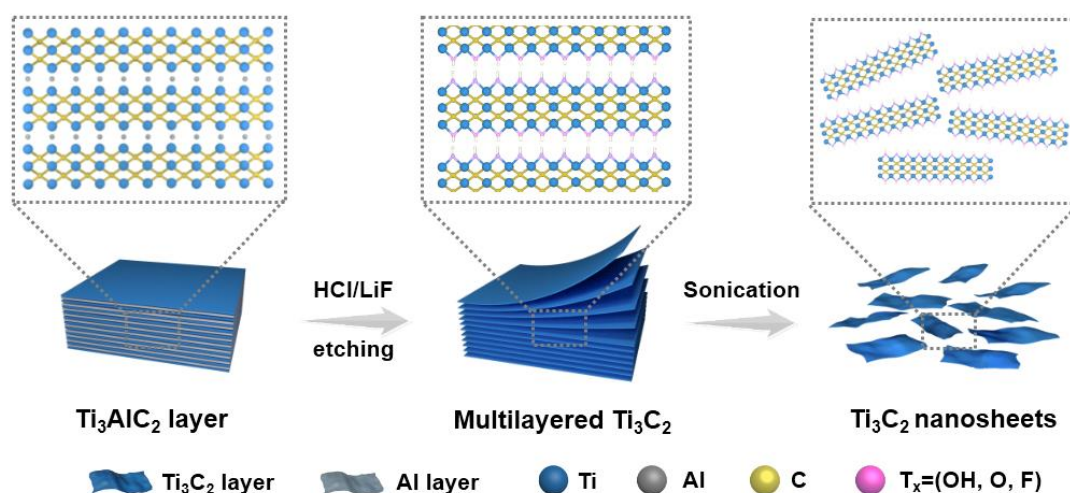

**Fig. S1** Schematic for the synthesis of Ti<sub>3</sub>C<sub>2</sub> MXene

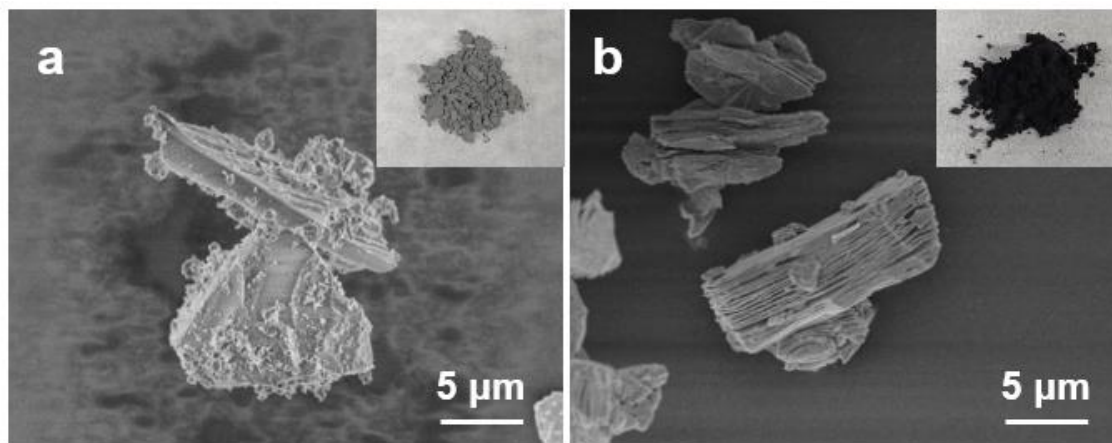

**Fig. S2** SEM images of (a) Ti<sub>3</sub>AlC<sub>2</sub> and (b) accordion-like multilayered MXene

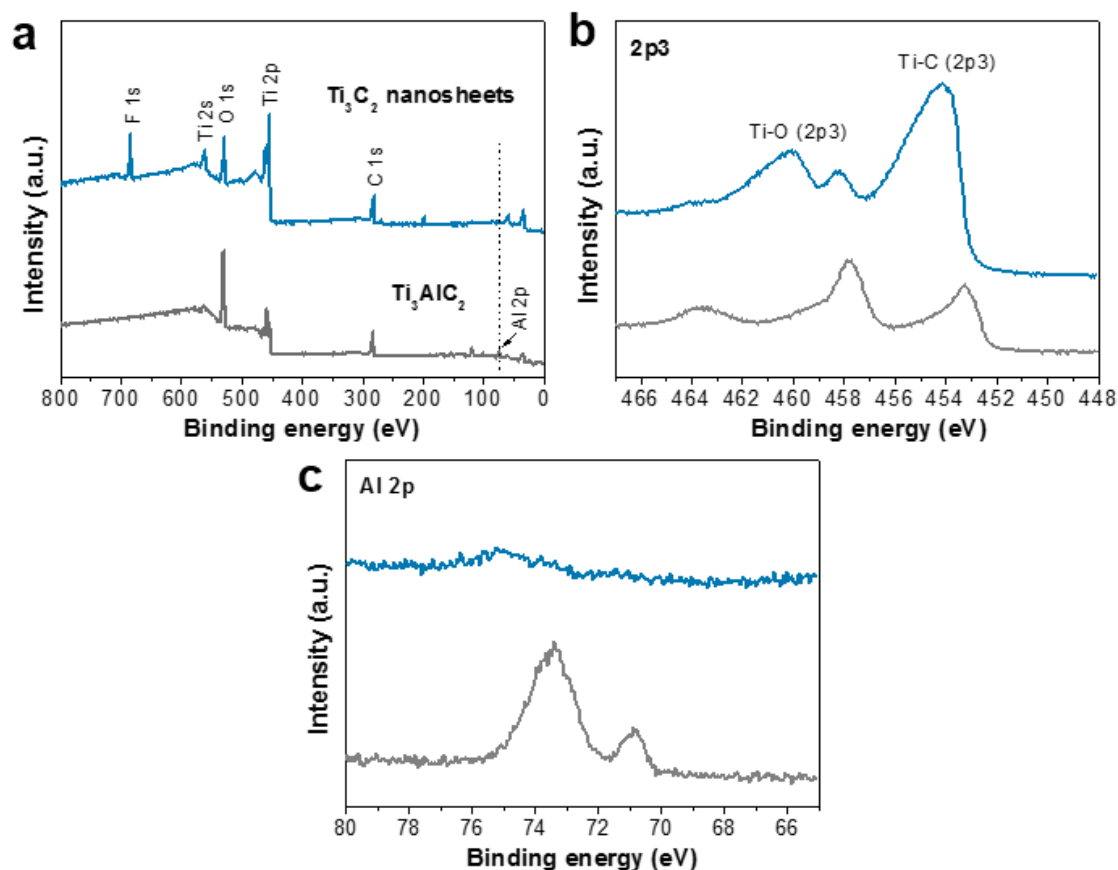

**Fig. S3** (a) XPS survey, (b) Ti 2p, and (c) Al 2p spectra of  $\text{Ti}_3\text{AlC}_2$  precursor and  $\text{Ti}_3\text{C}_2$  MXene nanosheets

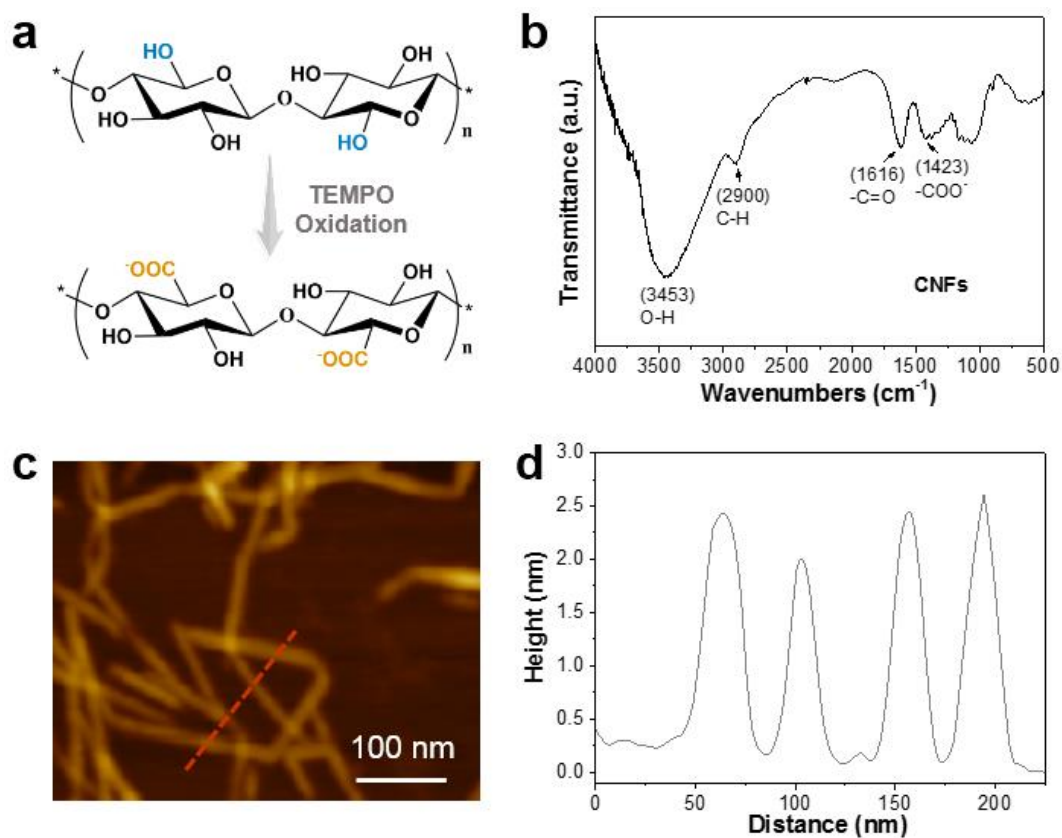

**Fig. S4** (a) Schematic of the TEMPO oxidation process to prepare CNFs. (b) FTIR spectra, (c) AFM image, and (d) height profiles of CNFs

## Nano-Micro Letters

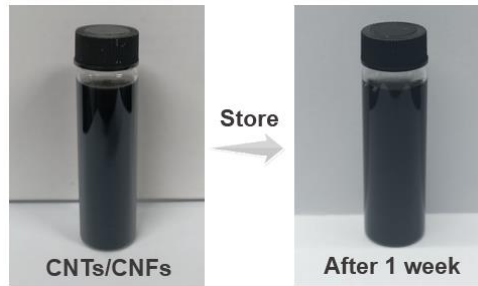

**Fig. S5** CNTs/CNFs solution stability test over a week

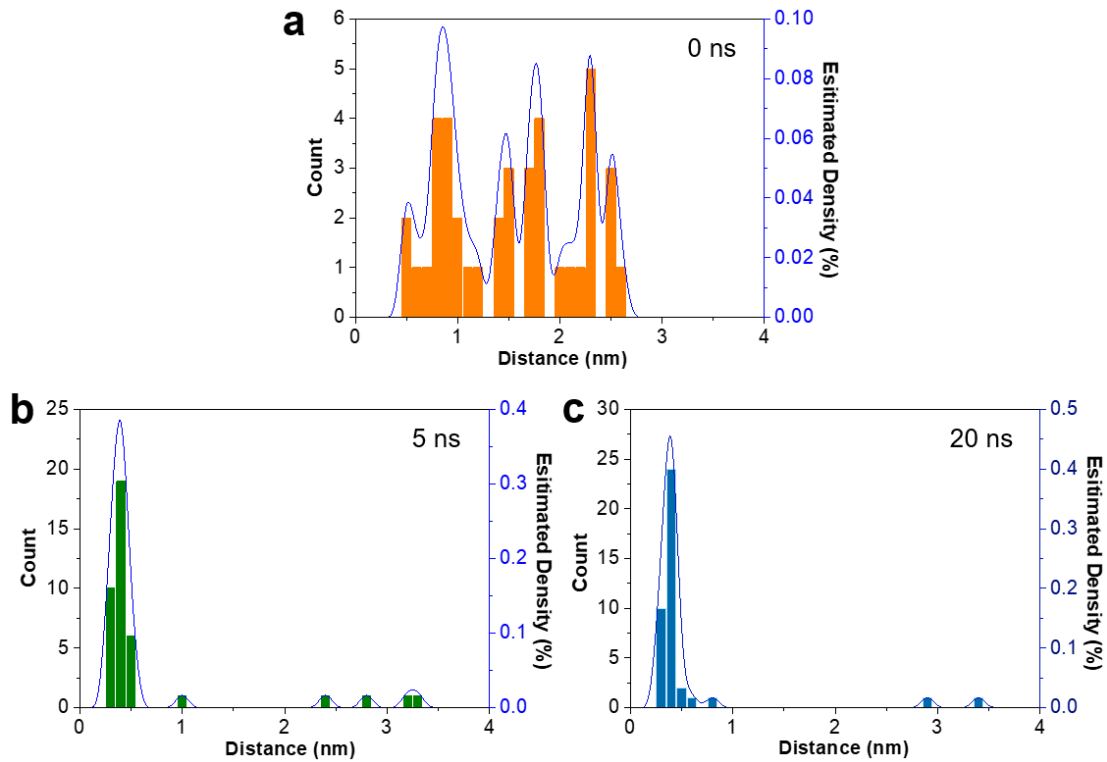

**Fig. S6** Histograms and estimated densities of the distance between the atoms of glucose and the surface of CNT at (a) 0, (b) 5, and (c) 20 ns

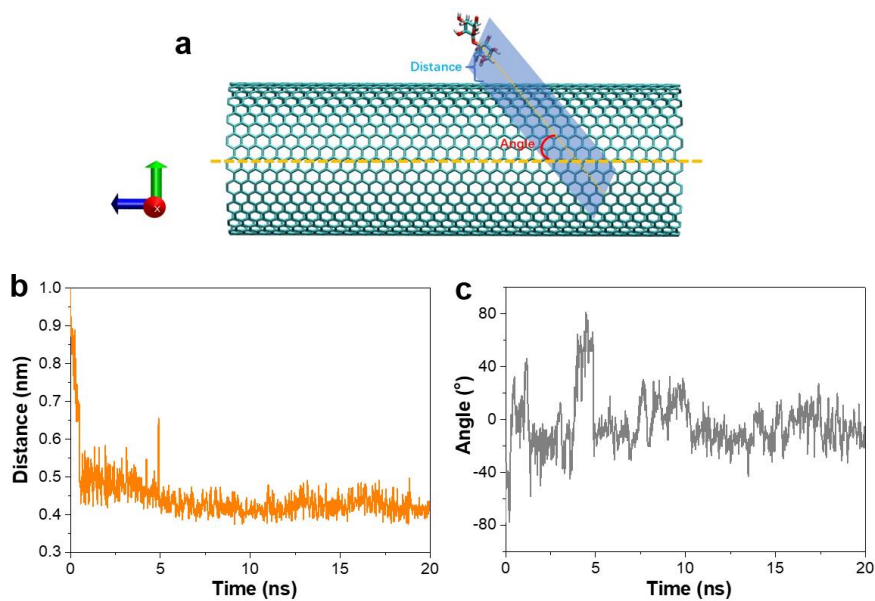

**Fig. S7** (a) Definition of the parameters between glucose and CNT. Evolution of (b) the distance and (c) the angle between glucose and CNT

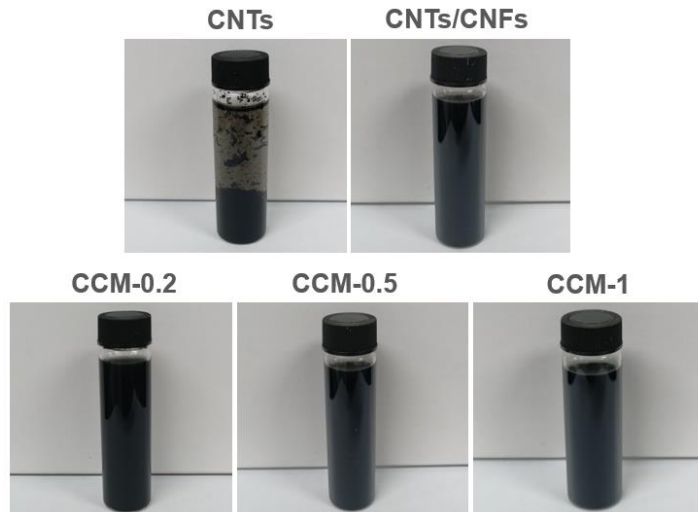

**Fig. S8** Digital photographs of CNTs, CNTs/CNFs, and CCM dispersion

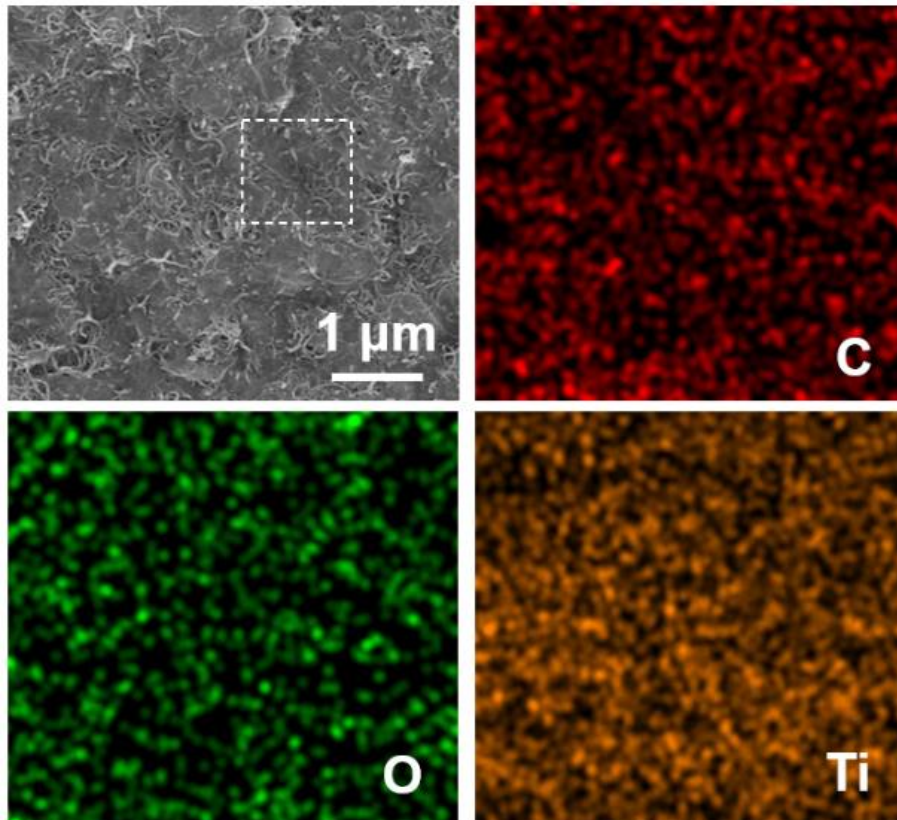

**Fig. S9** EDS elemental mapping image of the CCM film

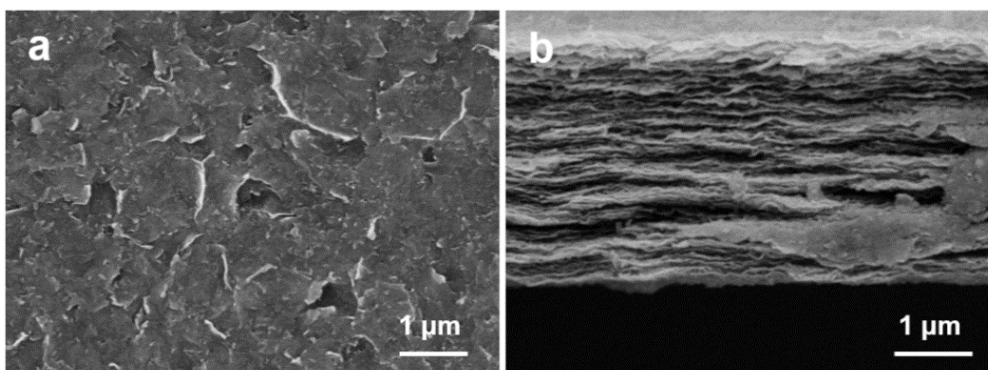

**Fig. S10** (a) Top-view and (b) cross-sectional c

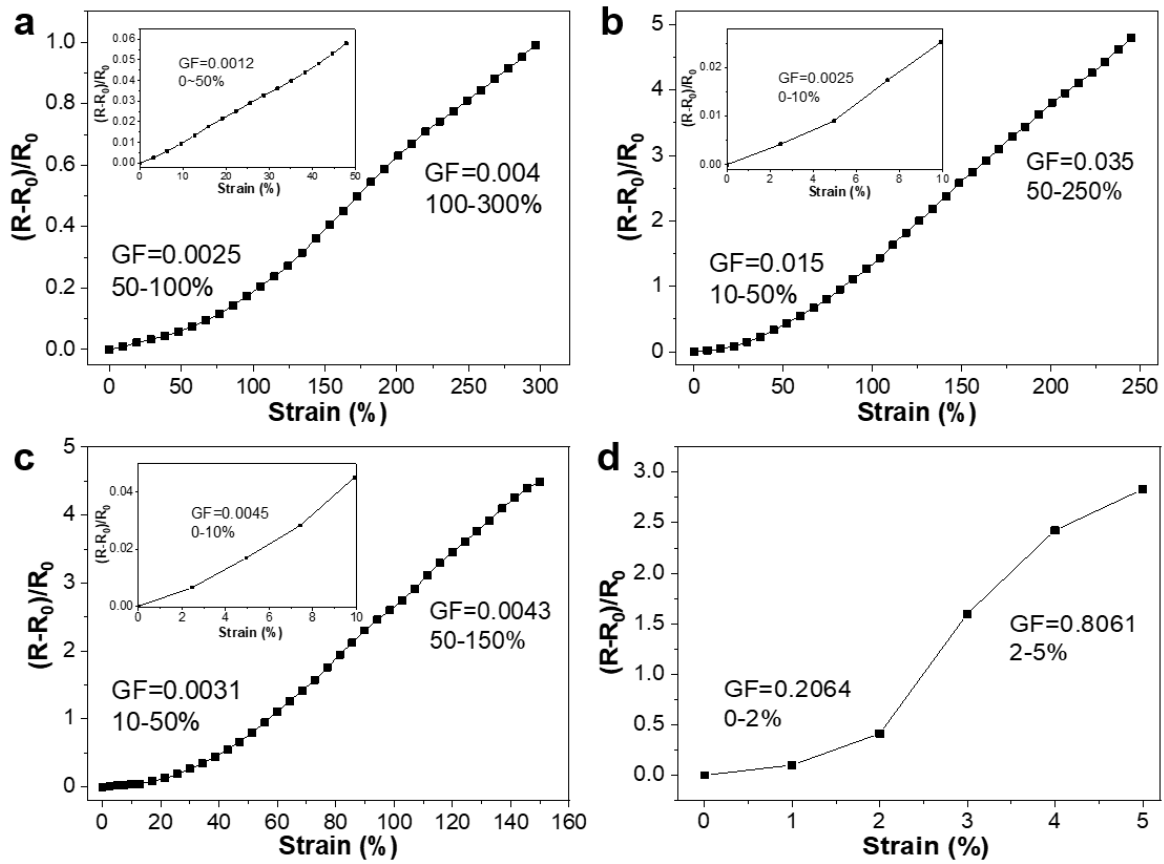

**Fig. S11** The GF and linear behavior of (a) CNFs/CNTs, (b) CCM-0.5, (c) CCM-1, and (d) pristine MXene e-skin

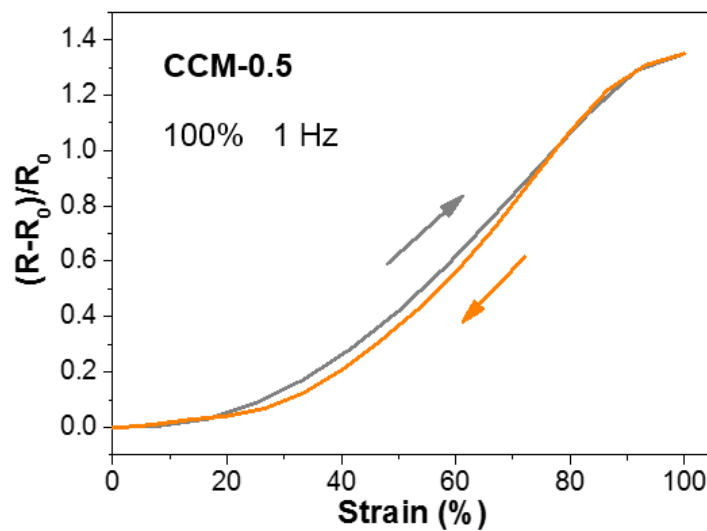

**Fig. S12** Typical relative resistance changes versus applied strain curves under one stretch and release cycle for the CCM-0.5 e-skin at a frequency of 1 Hz under 100% strain

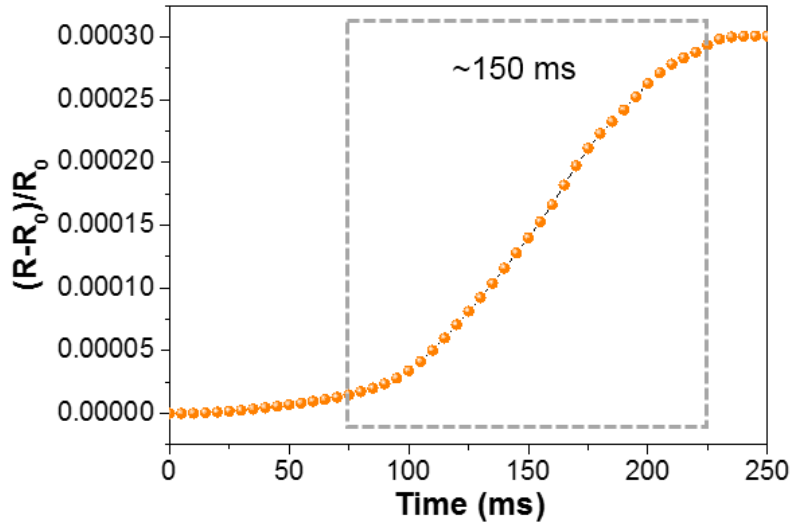

**Fig. S13** Relative resistance changes of the CCM-0.5 e-skin under a quasi-transient step strain of 0.5%

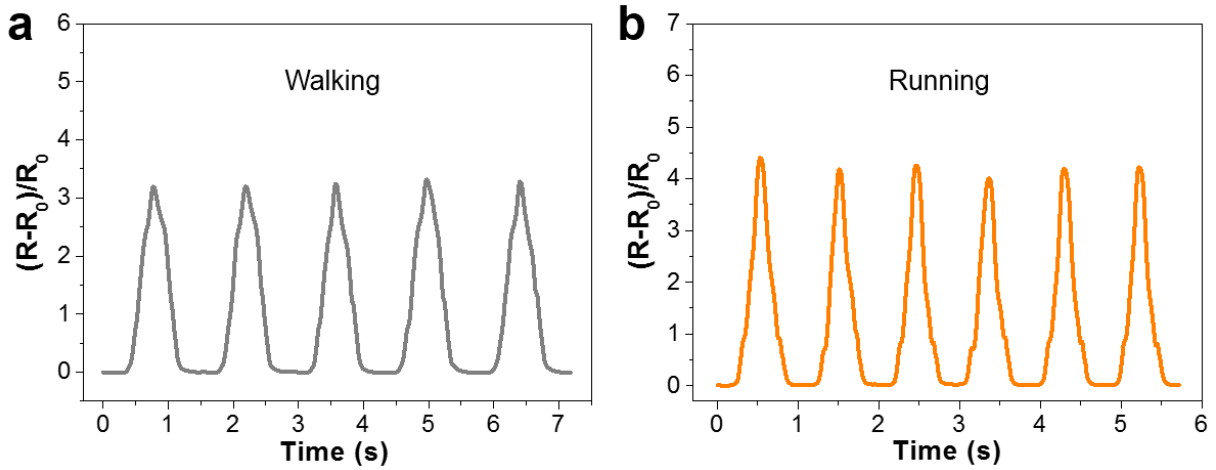

**Fig. S14** Responsive curves of the CCM-0.5 e-skin on the knee under motions of (a) walking and (b) running

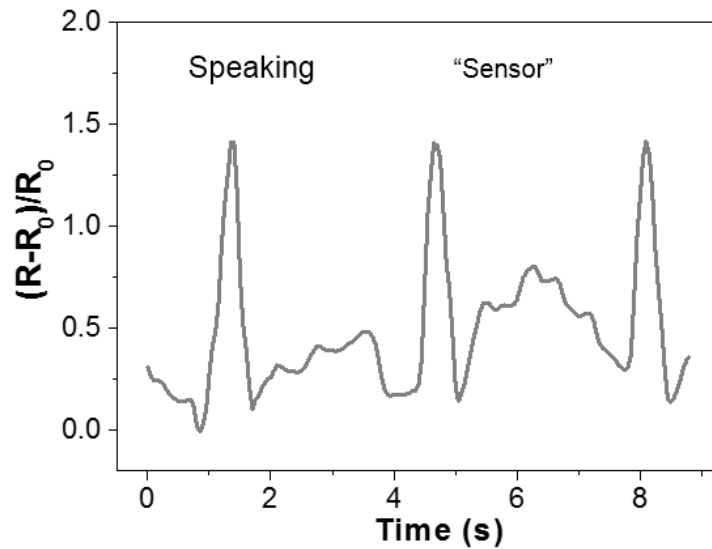

**Fig. S15** Responsive curve recorded during speaking "sensor"

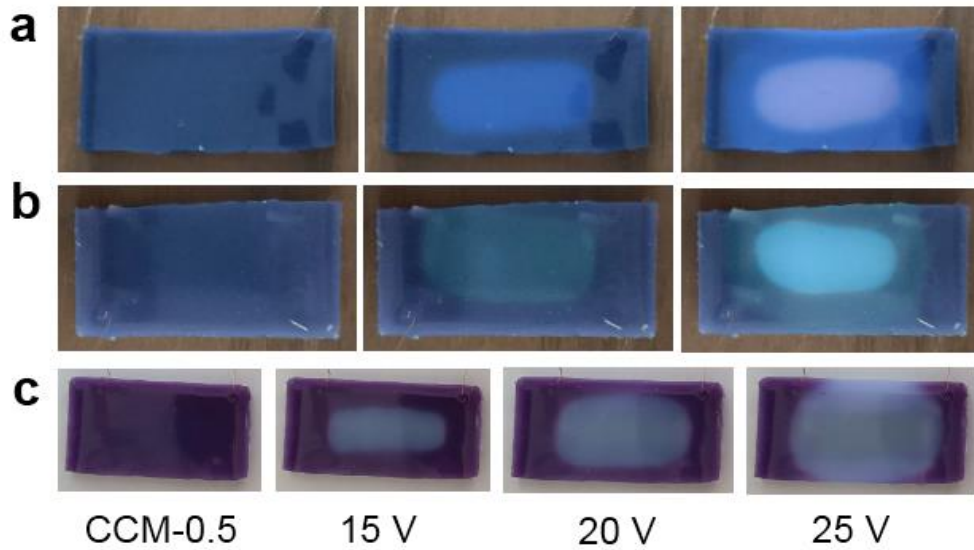

**Fig. S16** (a) Photographs of a sample with black and blue pigments that change color in response to an applied voltage of 20 V. (b) Photographs of a sample with black and purple pigments that change color in response to an applied voltage of 20 V. (c) Photographs of a sample with purple pigments that change color in response to various applied voltage

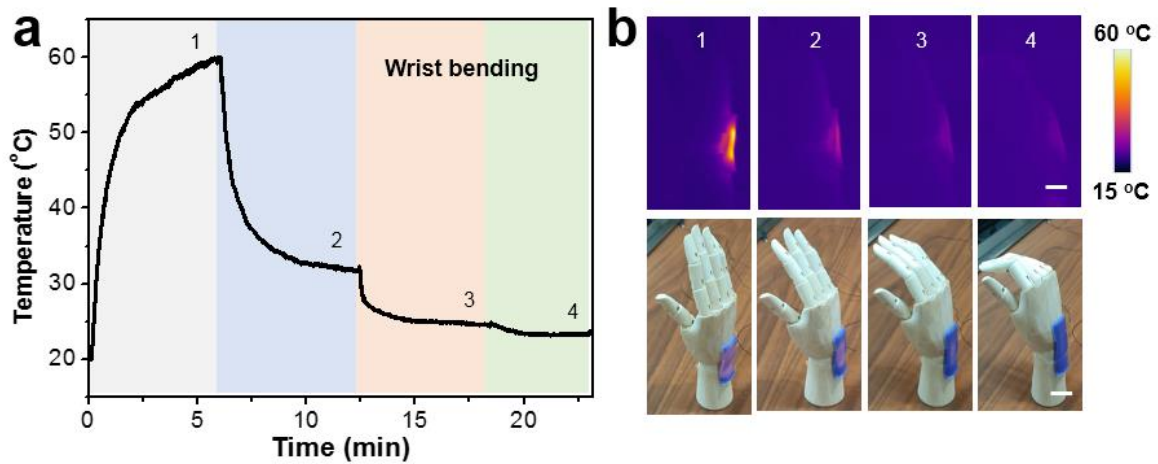

**Fig. S17** (a) Temperature variations of the CCM e-skin with gradually bending of wrist. (b) Photographs and corresponding temperature mapping of wrist under different states of motion in a) (scale bar: 2 cm)
